# Supplementary material for: Crystal structure analysis of four 2-pyridineformamide thiosemicarbazone derivatives using non-spherical atomic form factors
Source: Research Square preprint supplement (doi:10.21203/rs.3.rs-5093673/v1), 2024-12-09
Supplement: Supplementary file 1 [file 7cb667339c22066ba4899702.docx]

**Crystal structure analysis of four 2-pyridineformamide thiosemicarbazone derivatives using non-spherical atomic form factors**

Bhushan Shakya1,Kuldeep Mahiya 2, Ramina Maharjan Shrestha3, Hari Bhakta Oli1, Paras Nath Yadav*4

1Amrit Campus, Tribhuvan University, Kathmandu, Nepal

2Department of Chemistry, FGM Government College, Adampur, Hisar 125052, Haryana, India

3Trichandra Multiple Campus, Tribhuvan University, Kathmandu, Nepal,

4Central Department of Chemistry, Tribhuvan University, Kathmandu, Nepal

*Corresponding Author: E-mail addresses: pnyadav219@gmail.com (P.N. Yadav).

Contents: Page No.

Table S1-S4: Crystal data and structure refinement for (**1**) to (**4**) from IAM refinement S2-S5

Table S5-S12: Bond lengths and angles for (**1**) to (**4**) from IAM refinement S6-S9

Table S13-S16: Anisotropic displacement parameters for (**1**) to (**4**) from IAM refinement S10-S13

Table S17-S20: Hydrogen atom coordinates for (**1**) to (**4**) from IAM refinement S14-S17

Table S21-S24: Crystal data and structure refinement for (**1**) to (**4**) from HAR refinement S18-S21

Table S25-S32: Bond lengths and angles for (**1**) to (**4**) from HAR refinement S22-S25

Table S33-S36: Anisotropic displacement parameters for (**1**) to (**4**) HAR refinement S26-S30

Table S37-S40: Hydrogen atom coordinates for (**1**) to (**4**) from HAR refinement S31-S34

| **Table S1 Crystal data and structure refinement for** (**1**)**.** | |
| --- | --- |
| Empirical formula | C12H17N5OS |
| Formula weight | 279.36 |
| Temperature/K | 304.00 |
| Crystal system | monoclinic |
| Space group | P21/c |
| a/Å | 14.9048(8) |
| b/Å | 8.1728(4) |
| c/Å | 12.9151(6) |
| α/° | 90 |
| β/° | 115.6560(10) |
| γ/° | 90 |
| Volume/Å3 | 1418.13(12) |
| Z | 4 |
| ρcalcg/cm3 | 1.308 |
| μ/mm‑1 | 0.229 |
| F(000) | 592.0 |
| Crystal size/mm3 | 0.31 × 0.182 × 0.144 |
| Radiation | MoKα (λ = 0.71073) |
| 2θ range for data collection/° | 5.834 to 50.074 |
| Index ranges | -17 ≤ h ≤ 17, -9 ≤ k ≤ 9, -15 ≤ l ≤ 15 |
| Reflections collected | 33741 |
| Independent reflections | 2497 [Rint = 0.0662, Rsigma = 0.0273] |
| Data/restraints/parameters | 2497/3/185 |
| Goodness-of-fit on F2 | 1.098 |
| Final R indexes [I≥2σ (I)] | R1 = 0.0387, wR2 = 0.0983 |
| Final R indexes [all data] | R1 = 0.0481, wR2 = 0.1057 |
| Largest diff. peak/hole / e Å-3 | 0.23/-0.17 |

| **Table S2 Crystal data and structure refinement for (2).** | |
| --- | --- |
| Empirical formula | C12H17N5S2 |
| Formula weight | 295.42 |
| Temperature/K | 304.00 |
| Crystal system | monoclinic |
| Space group | P21/c |
| a/Å | 4.6976(3) |
| b/Å | 23.5228(14) |
| c/Å | 12.9680(8) |
| α/° | 90 |
| β/° | 98.898(2) |
| γ/° | 90 |
| Volume/Å3 | 1415.73(15) |
| Z | 4 |
| ρcalcg/cm3 | 1.386 |
| μ/mm‑1 | 0.370 |
| F(000) | 624.0 |
| Crystal size/mm3 | 0.577 × 0.19 × 0.033 |
| Radiation | MoKα (λ = 0.71073) |
| 2θ range for data collection/° | 6.092 to 50.648 |
| Index ranges | -5 ≤ h ≤ 5, -28 ≤ k ≤ 28, -15 ≤ l ≤ 15 |
| Reflections collected | 28763 |
| Independent reflections | 2583 [Rint = 0.0600, Rsigma = 0.0263] |
| Data/restraints/parameters | 2583/3/185 |
| Goodness-of-fit on F2 | 1.166 |
| Final R indexes [I≥2σ (I)] | R1 = 0.0473, wR2 = 0.1081 |
| Final R indexes [all data] | R1 = 0.0564, wR2 = 0.1129 |
| Largest diff. peak/hole / e Å-3 | 0.30/-0.21 |

| **Table S3 Crystal data and structure refinement for (3).** | |
| --- | --- |
| Empirical formula | C12H17N5S2 |
| Formula weight | 295.42 |
| Temperature/K | 304.00 |
| Crystal system | monoclinic |
| Space group | P21/c |
| a/Å | 12.7318(8) |
| b/Å | 9.3493(4) |
| c/Å | 12.7744(7) |
| α/° | 90 |
| β/° | 110.021(2) |
| γ/° | 90 |
| Volume/Å3 | 1428.69(13) |
| Z | 4 |
| ρcalcg/cm3 | 1.373 |
| μ/mm‑1 | 0.367 |
| F(000) | 624.0 |
| Crystal size/mm3 | 0.3 × 0.287 × 0.162 |
| Radiation | MoKα (λ = 0.71073) |
| 2θ range for data collection/° | 5.524 to 51.44 |
| Index ranges | -15 ≤ h ≤ 15, -11 ≤ k ≤ 11, -15 ≤ l ≤ 15 |
| Reflections collected | 41226 |
| Independent reflections | 2723 [Rint = 0.0617, Rsigma = 0.0232] |
| Data/restraints/parameters | 2723/3/185 |
| Goodness-of-fit on F2 | 1.062 |
| Final R indexes [I≥2σ (I)] | R1 = 0.0400, wR2 = 0.0971 |
| Final R indexes [all data] | R1 = 0.0475, wR2 = 0.1031 |
| Largest diff. peak/hole / e Å-3 | 0.33/-0.30 |

| **Table S4 Crystal data and structure refinement for (4).** | |
| --- | --- |
| Empirical formula | C14H21N5S |
| Formula weight | 291.42 |
| Temperature/K | 304.00 |
| Crystal system | monoclinic |
| Space group | P21/c |
| a/Å | 13.6786(8) |
| b/Å | 11.8525(6) |
| c/Å | 9.7198(5) |
| α/° | 90 |
| β/° | 104.815(2) |
| γ/° | 90 |
| Volume/Å3 | 1523.44(14) |
| Z | 4 |
| ρcalcg/cm3 | 1.271 |
| μ/mm‑1 | 0.211 |
| F(000) | 624.0 |
| Crystal size/mm3 | 0.61 × 0.325 × 0.055 |
| Radiation | MoKα (λ = 0.71073) |
| 2θ range for data collection/° | 6.162 to 50.08 |
| Index ranges | -16 ≤ h ≤ 16, -14 ≤ k ≤ 14, -11 ≤ l ≤ 11 |
| Reflections collected | 43335 |
| Independent reflections | 2702 [Rint = 0.0794, Rsigma = 0.0308] |
| Data/restraints/parameters | 2702/297/240 |
| Goodness-of-fit on F2 | 1.140 |
| Final R indexes [I≥2σ (I)] | R1 = 0.0500, wR2 = 0.1167 |
| Final R indexes [all data] | R1 = 0.0654, wR2 = 0.1266 |
| Largest diff. peak/hole / e Å-3 | 0.23/-0.18 |

| **Table S5 Bond Lengths for (1).** | | | | | | |
| --- | --- | --- | --- | --- | --- | --- |
| **Atom** | **Atom** | **Length/Å** |  | **Atom** | **Atom** | **Length/Å** |
| S1 | C8 | 1.7178(18) |  | N5 | C2 | 1.345(2) |
| O1 | C10 | 1.419(3) |  | N5 | C6 | 1.336(2) |
| O1 | C11 | 1.426(3) |  | C1 | C2 | 1.484(2) |
| N1 | C1 | 1.326(2) |  | C2 | C3 | 1.376(3) |
| N2 | N3 | 1.380(2) |  | C3 | C4 | 1.391(3) |
| N2 | C1 | 1.297(2) |  | C4 | C5 | 1.377(3) |
| N3 | C8 | 1.314(2) |  | C4 | C7 | 1.500(3) |
| N4 | C8 | 1.384(2) |  | C5 | C6 | 1.373(3) |
| N4 | C9 | 1.466(2) |  | C9 | C10 | 1.499(3) |
| N4 | C12 | 1.459(3) |  | C11 | C12 | 1.499(3) |

| **Table S6 Bond Angles for (1).** | | | | | | | | |
| --- | --- | --- | --- | --- | --- | --- | --- | --- |
| **Atom** | **Atom** | **Atom** | **Angle/˚** |  | **Atom** | **Atom** | **Atom** | **Angle/˚** |
| C10 | O1 | C11 | 109.06(17) |  | C2 | C3 | C4 | 119.74(18) |
| C1 | N2 | N3 | 120.48(15) |  | C3 | C4 | C7 | 121.29(19) |
| C8 | N3 | N2 | 113.12(14) |  | C5 | C4 | C3 | 116.60(18) |
| C8 | N4 | C9 | 118.49(15) |  | C5 | C4 | C7 | 122.11(19) |
| C8 | N4 | C12 | 120.86(15) |  | C6 | C5 | C4 | 120.10(19) |
| C12 | N4 | C9 | 112.36(16) |  | N5 | C6 | C5 | 124.12(19) |
| C6 | N5 | C2 | 115.70(17) |  | N3 | C8 | S1 | 125.65(14) |
| N1 | C1 | C2 | 122.16(17) |  | N3 | C8 | N4 | 114.16(15) |
| N2 | C1 | N1 | 120.32(17) |  | N4 | C8 | S1 | 120.19(13) |
| N2 | C1 | C2 | 117.52(15) |  | N4 | C9 | C10 | 110.15(18) |
| N5 | C2 | C1 | 113.90(16) |  | O1 | C10 | C9 | 112.2(2) |
| N5 | C2 | C3 | 123.72(17) |  | O1 | C11 | C12 | 111.63(18) |
| C3 | C2 | C1 | 122.38(16) |  | N4 | C12 | C11 | 110.30(18) |

| **Table S7 Bond Lengths for (2).** | | | | | | |
| --- | --- | --- | --- | --- | --- | --- |
| **Atom** | **Atom** | **Length/Å** |  | **Atom** | **Atom** | **Length/Å** |
| S1 | C8 | 1.730(2) |  | N5 | C2 | 1.338(3) |
| S2 | C10 | 1.810(3) |  | N5 | C6 | 1.333(4) |
| S2 | C11 | 1.806(3) |  | C1 | C2 | 1.479(3) |
| N1 | C1 | 1.326(3) |  | C2 | C3 | 1.378(3) |
| N2 | N3 | 1.386(3) |  | C3 | C4 | 1.389(3) |
| N2 | C1 | 1.302(3) |  | C4 | C5 | 1.381(4) |
| N3 | C8 | 1.342(3) |  | C4 | C7 | 1.497(4) |
| N4 | C8 | 1.360(3) |  | C5 | C6 | 1.377(4) |
| N4 | C9 | 1.465(3) |  | C9 | C10 | 1.507(4) |
| N4 | C12 | 1.451(3) |  | C11 | C12 | 1.516(4) |

| **Table S8 Bond Angles for (2).** | | | | | | | | |
| --- | --- | --- | --- | --- | --- | --- | --- | --- |
| **Atom** | **Atom** | **Atom** | **Angle/˚** |  | **Atom** | **Atom** | **Atom** | **Angle/˚** |
| C11 | S2 | C10 | 97.39(13) |  | C2 | C3 | C4 | 119.9(2) |
| C1 | N2 | N3 | 120.2(2) |  | C3 | C4 | C7 | 121.3(3) |
| C8 | N3 | N2 | 111.55(19) |  | C5 | C4 | C3 | 117.2(2) |
| C8 | N4 | C9 | 122.0(2) |  | C5 | C4 | C7 | 121.5(3) |
| C8 | N4 | C12 | 123.3(2) |  | C6 | C5 | C4 | 119.0(3) |
| C12 | N4 | C9 | 114.6(2) |  | N5 | C6 | C5 | 124.4(3) |
| C6 | N5 | C2 | 116.4(2) |  | N3 | C8 | S1 | 124.26(18) |
| N1 | C1 | C2 | 118.8(2) |  | N3 | C8 | N4 | 114.1(2) |
| N2 | C1 | N1 | 120.6(2) |  | N4 | C8 | S1 | 121.68(17) |
| N2 | C1 | C2 | 120.6(2) |  | N4 | C9 | C10 | 111.6(2) |
| N5 | C2 | C1 | 114.1(2) |  | C9 | C10 | S2 | 112.86(19) |
| N5 | C2 | C3 | 123.1(2) |  | C12 | C11 | S2 | 112.3(2) |
| C3 | C2 | C1 | 122.8(2) |  | N4 | C12 | C11 | 111.5(2) |

| **Table S9 Bond Lengths for (3).** | | | | | | |
| --- | --- | --- | --- | --- | --- | --- |
| **Atom** | **Atom** | **Length/Å** |  | **Atom** | **Atom** | **Length/Å** |
| S1 | C8 | 1.7235(18) |  | N5 | C2 | 1.348(2) |
| S2 | C10 | 1.812(2) |  | N5 | C6 | 1.332(2) |
| S2 | C11 | 1.802(2) |  | C1 | C2 | 1.480(3) |
| N1 | C1 | 1.329(2) |  | C2 | C3 | 1.376(3) |
| N2 | N3 | 1.379(2) |  | C3 | C4 | 1.381(3) |
| N2 | C1 | 1.299(2) |  | C4 | C5 | 1.370(3) |
| N3 | C8 | 1.328(2) |  | C5 | C6 | 1.391(3) |
| N4 | C8 | 1.365(2) |  | C6 | C7 | 1.506(3) |
| N4 | C9 | 1.464(2) |  | C9 | C10 | 1.506(3) |
| N4 | C12 | 1.460(2) |  | C11 | C12 | 1.512(3) |

| **Table S10 Bond Angles for (3).** | | | | | | | | |
| --- | --- | --- | --- | --- | --- | --- | --- | --- |
| **Atom** | **Atom** | **Atom** | **Angle/˚** |  | **Atom** | **Atom** | **Atom** | **Angle/˚** |
| C11 | S2 | C10 | 96.81(10) |  | C2 | C3 | C4 | 118.24(19) |
| C1 | N2 | N3 | 119.34(15) |  | C5 | C4 | C3 | 119.4(2) |
| C8 | N3 | N2 | 113.66(15) |  | C4 | C5 | C6 | 119.06(19) |
| C8 | N4 | C9 | 121.78(16) |  | N5 | C6 | C5 | 122.31(19) |
| C8 | N4 | C12 | 123.20(15) |  | N5 | C6 | C7 | 117.34(18) |
| C12 | N4 | C9 | 114.64(15) |  | C5 | C6 | C7 | 120.35(19) |
| C6 | N5 | C2 | 117.82(17) |  | N3 | C8 | S1 | 125.07(14) |
| N1 | C1 | C2 | 121.75(17) |  | N3 | C8 | N4 | 114.66(16) |
| N2 | C1 | N1 | 119.09(17) |  | N4 | C8 | S1 | 120.23(14) |
| N2 | C1 | C2 | 119.16(16) |  | N4 | C9 | C10 | 112.42(18) |
| N5 | C2 | C1 | 115.09(16) |  | C9 | C10 | S2 | 112.29(16) |
| N5 | C2 | C3 | 123.18(18) |  | C12 | C11 | S2 | 111.74(15) |
| C3 | C2 | C1 | 121.72(17) |  | N4 | C12 | C11 | 111.82(17) |

| **Table S11 Bond Lengths for (4).** | | | | | | |
| --- | --- | --- | --- | --- | --- | --- |
| **Atom** | **Atom** | **Length/Å** |  | **Atom** | **Atom** | **Length/Å** |
| S1 | C8 | 1.732(2) |  | C4 | C5 | 1.388(3) |
| N1 | C1 | 1.335(3) |  | C4 | C7 | 1.497(3) |
| N2 | N3 | 1.373(3) |  | C5 | C6 | 1.377(4) |
| N2 | C1 | 1.299(3) |  | C9 | C10 | 1.525(8) |
| N3 | C8 | 1.329(3) |  | C9A | C10A | 1.49(2) |
| N4 | C8 | 1.362(3) |  | C10 | C11 | 1.539(11) |
| N4 | C9 | 1.480(6) |  | C10A | C11A | 1.55(2) |
| N4 | C9A | 1.43(2) |  | C11A | C12A | 1.73(5) |
| N4 | C14 | 1.453(3) |  | C11 | C12 | 1.461(10) |
| N5 | C2 | 1.348(3) |  | C12 | C13 | 1.556(10) |
| N5 | C6 | 1.328(3) |  | C12A | C13A | 1.38(4) |
| C1 | C2 | 1.475(3) |  | C13 | C14 | 1.503(8) |
| C2 | C3 | 1.377(3) |  | C13A | C14 | 1.52(3) |
| C3 | C4 | 1.387(3) |  |  |  |  |

| **Table S12 Bond Angles for (4).** | | | | | | | | |
| --- | --- | --- | --- | --- | --- | --- | --- | --- |
| **Atom** | **Atom** | **Atom** | **Angle/˚** |  | **Atom** | **Atom** | **Atom** | **Angle/˚** |
| C1 | N2 | N3 | 121.58(18) |  | C6 | C5 | C4 | 119.6(2) |
| C8 | N3 | N2 | 112.43(18) |  | N5 | C6 | C5 | 124.4(2) |
| C8 | N4 | C9 | 117.8(4) |  | N3 | C8 | S1 | 124.67(18) |
| C8 | N4 | C9A | 127.3(17) |  | N3 | C8 | N4 | 114.7(2) |
| C8 | N4 | C14 | 122.4(2) |  | N4 | C8 | S1 | 120.63(17) |
| C9A | N4 | C14 | 108.6(17) |  | N4 | C9 | C10 | 115.1(6) |
| C14 | N4 | C9 | 119.5(4) |  | N4 | C9A | C10A | 105.0(16) |
| C6 | N5 | C2 | 116.0(2) |  | C9 | C10 | C11 | 112.7(6) |
| N1 | C1 | C2 | 121.9(2) |  | C9A | C10A | C11A | 117(2) |
| N2 | C1 | N1 | 119.8(2) |  | C10A | C11A | C12A | 105(2) |
| N2 | C1 | C2 | 118.24(19) |  | C12 | C11 | C10 | 114.2(8) |
| N5 | C2 | C1 | 115.31(19) |  | C11 | C12 | C13 | 113.9(6) |
| N5 | C2 | C3 | 123.3(2) |  | C13A | C12A | C11A | 109(2) |
| C3 | C2 | C1 | 121.34(19) |  | C14 | C13 | C12 | 115.1(5) |
| C2 | C3 | C4 | 120.1(2) |  | C12A | C13A | C14 | 117(2) |
| C3 | C4 | C5 | 116.5(2) |  | N4 | C14 | C13 | 112.3(3) |
| C3 | C4 | C7 | 120.7(2) |  | N4 | C14 | C13A | 119.7(11) |
| C5 | C4 | C7 | 122.8(2) |  |  |  |  |  |

| **Table S13 Anisotropic Displacement Parameters (Å2×103) for (1). The Anisotropic displacement factor exponent takes the form: -2π2[h2a*2U11+2hka*b*U12+…].** | | | | | | |
| --- | --- | --- | --- | --- | --- | --- |
| **Atom** | **U11** | **U22** | **U33** | **U23** | **U13** | **U12** |
| S1 | 48.7(3) | 54.6(3) | 53.6(3) | 4.4(2) | 35.2(3) | 8.0(2) |
| O1 | 43.2(8) | 70.7(10) | 61.5(9) | 10.6(8) | 22.1(7) | 19.4(7) |
| N1 | 31.0(9) | 64.1(12) | 47.1(10) | 11.8(9) | 18.6(8) | 1.8(8) |
| N2 | 32.3(8) | 41.6(9) | 44.5(9) | 3.5(7) | 21.3(7) | 3.7(7) |
| N3 | 30.2(8) | 47.1(9) | 44.0(9) | 5.8(7) | 19.6(7) | 5.7(7) |
| N4 | 37.3(9) | 55.8(10) | 42.2(9) | 9.2(8) | 21.4(7) | 13.1(8) |
| N5 | 39.9(9) | 40.7(9) | 53.6(9) | 3.0(8) | 27.8(8) | 3.6(7) |
| C1 | 32.0(9) | 34.3(9) | 36.4(9) | -4.8(8) | 15.3(8) | -3.4(7) |
| C2 | 32.6(9) | 31.4(9) | 40.5(9) | -6.4(8) | 17.2(8) | -3.2(7) |
| C3 | 38.0(10) | 42.3(11) | 40.3(10) | -3.9(8) | 16.9(8) | -4.3(8) |
| C4 | 39.3(10) | 36.6(10) | 41.0(10) | -7.8(8) | 8.1(8) | -1.2(8) |
| C5 | 34.9(10) | 44.8(11) | 65.2(13) | -5.8(10) | 17.9(10) | 4.9(9) |
| C6 | 43.7(11) | 48.0(12) | 71.1(14) | 2.5(11) | 36.0(11) | 4.6(9) |
| C7 | 61.6(14) | 59.2(14) | 49.1(13) | 1.3(11) | 10.9(11) | 9.0(11) |
| C8 | 32.8(9) | 34.6(9) | 40.4(10) | -3.8(8) | 18.3(8) | -1.8(7) |
| C9 | 46.5(12) | 83.8(17) | 52.6(12) | 13.0(12) | 29.8(10) | 23.6(11) |
| C10 | 47.6(13) | 94.1(19) | 77.4(16) | 25.3(15) | 37.1(12) | 24.4(13) |
| C11 | 54.4(13) | 65.0(14) | 48.5(12) | 7.6(11) | 15.7(10) | 13.9(11) |
| C12 | 49.9(12) | 61.9(14) | 54.4(12) | 13.5(11) | 28.3(10) | 14.3(10) |

| **Table S14 Anisotropic Displacement Parameters (Å2×103) for (2). The Anisotropic displacement factor exponent takes the form: -2π2[h2a*2U11+2hka*b*U12+…].** | | | | | | |
| --- | --- | --- | --- | --- | --- | --- |
| **Atom** | **U11** | **U22** | **U33** | **U23** | **U13** | **U12** |
| S1 | 54.7(4) | 38.6(4) | 27.9(3) | 0.3(3) | 5.6(3) | -0.7(3) |
| S2 | 69.3(6) | 34.9(4) | 73.7(6) | -7.0(4) | 10.7(4) | -4.7(3) |
| N1 | 62.6(16) | 51.4(15) | 30.2(12) | -1.5(11) | 8.4(11) | -19.6(13) |
| N2 | 37.7(11) | 31.3(11) | 28.5(11) | -2.6(9) | 5.8(9) | -5.3(9) |
| N3 | 35.2(11) | 29.2(10) | 32.0(10) | -1.6(8) | 8.8(8) | -7.0(8) |
| N4 | 45.2(12) | 36.9(12) | 31.8(11) | 1.4(9) | 8.8(9) | -9.7(10) |
| N5 | 48.1(14) | 50.3(14) | 40.0(13) | 11.7(10) | 8.1(10) | -9.9(11) |
| C1 | 32.2(12) | 31.4(13) | 30.5(12) | 0.6(10) | 6.1(10) | 1.5(10) |
| C2 | 31.9(12) | 27.1(12) | 35.3(13) | 1.2(10) | 7.1(10) | 4.6(10) |
| C3 | 38.8(14) | 30.3(13) | 34.2(13) | 1.0(10) | 6.8(11) | -0.5(10) |
| C4 | 40.6(14) | 30.4(13) | 45.7(15) | -5.5(11) | 3.4(12) | 0.0(11) |
| C5 | 45.4(16) | 36.2(15) | 66(2) | 3.3(13) | 5.9(14) | -10.5(12) |
| C6 | 57.9(19) | 52.2(18) | 56.8(19) | 17.3(15) | 9.5(15) | -16.4(15) |
| C7 | 70(2) | 65(2) | 54.3(19) | -10.2(16) | -6.4(16) | -18.3(17) |
| C8 | 31.2(12) | 26.5(12) | 30.7(12) | 0.7(9) | 6.1(10) | 7.0(10) |
| C9 | 44.1(15) | 41.2(15) | 37.2(14) | 1.2(11) | 1.9(11) | -10.5(12) |
| C10 | 50.8(17) | 53.6(17) | 47.1(16) | -11.8(14) | 11.2(13) | -9.1(14) |
| C11 | 52.6(17) | 38.8(15) | 53.8(18) | 11.4(13) | 9.6(14) | 1.1(13) |
| C12 | 42.8(14) | 38.4(14) | 42.5(14) | 3.0(11) | 18.4(12) | -4.2(11) |

| **Table S15 Anisotropic Displacement Parameters (Å2×103) for (3). The Anisotropic displacement factor exponent takes the form: -2π2[h2a*2U11+2hka*b*U12+…].** | | | | | | |
| --- | --- | --- | --- | --- | --- | --- |
| **Atom** | **U11** | **U22** | **U33** | **U23** | **U13** | **U12** |
| S1 | 84.3(4) | 37.9(3) | 25.1(3) | 3.9(2) | 16.4(3) | 6.1(3) |
| S2 | 53.5(4) | 73.3(4) | 42.7(3) | -9.0(3) | 4.7(3) | 20.5(3) |
| N1 | 71.7(13) | 37.8(10) | 29.1(9) | -1.1(8) | 10.7(9) | 11.4(9) |
| N2 | 40.6(9) | 32.0(8) | 25.7(8) | 1.9(7) | 9.2(7) | 2.6(7) |
| N3 | 43.5(9) | 32.7(8) | 28.3(8) | 3.9(6) | 11.1(7) | 6.8(7) |
| N4 | 57.3(11) | 38.2(9) | 27.5(8) | 4.2(7) | 15.6(8) | 14.3(8) |
| N5 | 35.9(9) | 33.7(8) | 32.2(8) | 1.0(7) | 10.3(7) | -0.2(7) |
| C1 | 31.6(10) | 31.9(9) | 29.0(9) | -1.2(7) | 8.5(7) | -3.3(7) |
| C2 | 29.9(9) | 31.8(9) | 30.3(9) | -0.7(7) | 7.9(7) | -4.0(7) |
| C3 | 55.5(13) | 41.5(12) | 33.7(10) | -5.8(9) | 8.0(9) | 5.2(10) |
| C4 | 69.9(16) | 36.8(12) | 49.8(13) | -6.3(10) | 11.9(12) | 11.7(11) |
| C5 | 50.6(13) | 34.4(11) | 50.3(13) | 7.7(9) | 9.8(10) | 6.3(9) |
| C6 | 35.7(10) | 37.1(10) | 37.5(10) | 6.4(8) | 11.0(8) | 1.1(8) |
| C7 | 73.5(17) | 59.7(15) | 40.7(12) | 14.7(11) | 20.5(12) | 17.3(13) |
| C8 | 36.0(10) | 32.3(9) | 27.6(9) | 2.1(7) | 12.7(8) | -2.2(8) |
| C9 | 58.3(13) | 45.6(12) | 31.5(10) | 9.4(9) | 21.2(9) | 14.8(10) |
| C10 | 62.8(15) | 61.8(15) | 33.1(11) | -9.3(10) | 11.1(10) | 10.2(12) |
| C11 | 53.7(12) | 41.0(11) | 46.1(12) | -5.5(9) | 25.8(10) | 0.0(10) |
| C12 | 55.6(13) | 34.5(10) | 31.7(10) | -2.3(8) | 12.5(9) | 6.5(9) |

| **Table S16 Anisotropic Displacement Parameters (Å2×103) for (4). The Anisotropic displacement factor exponent takes the form: -2π2[h2a*2U11+2hka*b*U12+…].** | | | | | | |
| --- | --- | --- | --- | --- | --- | --- |
| **Atom** | **U11** | **U22** | **U33** | **U23** | **U13** | **U12** |
| S1 | 64.2(4) | 35.8(3) | 91.0(5) | -11.0(3) | 29.9(4) | -5.4(3) |
| N1 | 58.5(13) | 34.3(11) | 70.8(14) | 1.3(9) | 29.7(11) | -3.7(10) |
| N2 | 47.8(11) | 32.0(10) | 61.3(12) | -0.6(9) | 18.3(9) | -3.0(9) |
| N3 | 45.0(11) | 38.7(10) | 63.4(12) | -0.4(9) | 23.1(9) | -4.0(8) |
| N4 | 49.4(12) | 47.0(12) | 68.3(13) | -0.2(10) | 23.9(10) | 3.5(9) |
| N5 | 51.5(11) | 32.6(10) | 63.3(12) | -0.4(9) | 16.4(10) | -2.6(8) |
| C1 | 44.1(12) | 32.7(11) | 46.9(13) | -3.5(9) | 10.2(10) | -4.1(9) |
| C2 | 42.3(12) | 33.6(11) | 44.2(12) | -1.1(9) | 7.9(9) | -3.3(9) |
| C3 | 53.1(14) | 34.7(12) | 49.0(13) | -0.9(10) | 13.7(11) | -0.8(10) |
| C4 | 47.2(13) | 51.9(14) | 47.0(13) | -2.5(10) | 13.1(10) | -3.7(11) |
| C5 | 55.9(15) | 50.2(14) | 60.8(15) | 2.1(12) | 19.3(12) | -12.6(12) |
| C6 | 62.5(16) | 34.9(12) | 70.8(17) | 2.9(11) | 21.2(13) | -6.4(11) |
| C7 | 67.9(18) | 73.6(19) | 87(2) | -5.7(16) | 41.1(16) | 0.7(15) |
| C8 | 42.3(12) | 41.4(12) | 50.3(13) | -4.8(10) | 9.0(10) | -3.9(10) |
| C9 | 54(2) | 43(2) | 88(4) | 12(2) | 34(3) | 3(2) |
| C9A | 80(11) | 78(11) | 76(10) | 23(9) | 39(9) | 23(9) |
| C10 | 64(2) | 47.6(19) | 105(3) | 3.8(19) | 38(2) | -5.7(16) |
| C10A | 79(9) | 48(7) | 94(10) | 6(7) | 28(8) | 7(6) |
| C11A | 72(12) | 47(10) | 93(11) | -26(9) | 39(9) | 9(9) |
| C11 | 57(3) | 77(6) | 142(6) | -3(4) | 9(4) | -7(3) |
| C12 | 57(3) | 89(3) | 96(4) | -8(3) | 21(3) | 15(2) |
| C12A | 49(10) | 116(16) | 82(14) | -9(13) | 14(9) | 25(10) |
| C13 | 78(3) | 60(3) | 80(4) | 12(3) | 38(3) | 32(3) |
| C13A | 75(12) | 71(14) | 95(17) | -7(12) | 36(11) | 16(11) |
| C14 | 70.4(18) | 60.4(16) | 71.3(18) | -8.3(13) | 33.1(15) | 2.1(14) |

| **Table S17 Hydrogen Atom Coordinates (Å×104) and Isotropic Displacement Parameters (Å2×103) for (1).** | | | | |
| --- | --- | --- | --- | --- |
| **Atom** | ***x*** | ***y*** | ***z*** | **U(eq)** |
| H1A | 7043(16) | 7780(20) | 4460(16) | 50(6) |
| H1B | 7755(13) | 6650(30) | 5324(17) | 52(6) |
| H2 | 6423(15) | 5670(30) | 6695(17) | 52(6) |
| H3 | 5511.53 | 8526.19 | 3564.28 | 48 |
| H5 | 2975.46 | 8864.91 | 3894.77 | 60 |
| H6 | 3670.34 | 7272.08 | 5490.73 | 60 |
| H7A | 4223.13 | 10157.36 | 2207.06 | 92 |
| H7B | 3489.44 | 10952.38 | 2639.05 | 92 |
| H7C | 3176.18 | 9369.06 | 1879.77 | 92 |
| H9A | 9220 | 4036.26 | 6987.63 | 70 |
| H9B | 9018.64 | 2190.68 | 7154.75 | 70 |
| H10A | 10705.34 | 2531.87 | 7725.32 | 83 |
| H10B | 10744.78 | 3943.5 | 8566.58 | 83 |
| H11A | 10561.7 | 3367.96 | 10221.92 | 70 |
| H11B | 10405.88 | 1558.09 | 10515.44 | 70 |
| H12A | 8821.33 | 1517.51 | 9020.66 | 64 |
| H12B | 8905.68 | 3009.85 | 9824.16 | 64 |

| **Table S18 Hydrogen Atom Coordinates (Å×104) and Isotropic Displacement Parameters (Å2×103) for (2).** | | | | |
| --- | --- | --- | --- | --- |
| **Atom** | ***x*** | ***y*** | ***z*** | **U(eq)** |
| H1A | 5570(60) | 3101(10) | 5030(20) | 59(9) |
| H1B | 7700(60) | 3579(12) | 4830(20) | 50(9) |
| H2 | 6860(60) | 3244(13) | 7612(14) | 56(9) |
| H3 | 10446.03 | 3791.8 | 8086.3 | 41 |
| H5 | 15090.08 | 5050.52 | 7102.92 | 59 |
| H6 | 12834.22 | 4873.43 | 5445.75 | 67 |
| H7A | 13177.11 | 4676.2 | 9310.22 | 97 |
| H7B | 16083.22 | 4793.15 | 8894.54 | 97 |
| H7C | 15277.51 | 4172.31 | 9181.1 | 97 |
| H9A | 925.57 | 2280.91 | 5645.97 | 50 |
| H9B | -1861.27 | 2025.5 | 5994.31 | 50 |
| H10A | 3241.91 | 1406.18 | 5918.34 | 60 |
| H10B | 415.74 | 1340.78 | 5108.94 | 60 |
| H11A | 543.4 | 965.92 | 8435.68 | 58 |
| H11B | 3316.24 | 1173.42 | 8011.47 | 58 |
| H12A | -1834.33 | 1812.01 | 7851.46 | 48 |
| H12B | 943.05 | 1944.22 | 8654.17 | 48 |

| **Table S19 Hydrogen Atom Coordinates (Å×104) and Isotropic Displacement Parameters (Å2×103) for (3).** | | | | |
| --- | --- | --- | --- | --- |
| **Atom** | ***x*** | ***y*** | ***z*** | **U(eq)** |
| H1A | 2688(19) | 6970(20) | 6549(19) | 47(7) |
| H1B | 2330(20) | 8470(20) | 6661(19) | 54(7) |
| H2 | 2080(20) | 6760(30) | 3871(14) | 50(7) |
| H3 | 1520.46 | 10344.61 | 5841.1 | 55 |
| H4 | 739.05 | 12352.26 | 4782.81 | 65 |
| H5 | 325.39 | 12285.66 | 2875.02 | 56 |
| H7A | 805.75 | 9251.5 | 1389.28 | 87 |
| H7B | 1005.86 | 10902.45 | 1353.05 | 87 |
| H7C | -188.83 | 10319.86 | 1214.9 | 87 |
| H9A | 3302.91 | 2264.09 | 6415.26 | 52 |
| H9B | 3316.15 | 3932.64 | 6543.2 | 52 |
| H10A | 5018.55 | 3011.71 | 7667.15 | 65 |
| H10B | 5205.76 | 3989.36 | 6749.06 | 65 |
| H11A | 5325.93 | 2920.92 | 4826.18 | 54 |
| H11B | 5239.19 | 1279.85 | 4553.27 | 54 |
| H12A | 3490.17 | 2292.48 | 3727.2 | 49 |
| H12B | 3432.02 | 1237.93 | 4661.04 | 49 |

| **Table S20 Hydrogen Atom Coordinates (Å×104) and Isotropic Displacement Parameters (Å2×103) for (4).** | | | | |
| --- | --- | --- | --- | --- |
| **Atom** | ***x*** | ***y*** | ***z*** | **U(eq)** |
| H1A | 5626(17) | 4680(20) | 2630(20) | 57(7) |
| H1B | 4712(18) | 4850(20) | 3200(30) | 77(10) |
| H2 | 5950(19) | 2003(15) | 3150(30) | 58(7) |
| H3 | 3850.22 | 4171.96 | 4521.66 | 55 |
| H5 | 2844.17 | 1265.33 | 5738.42 | 66 |
| H6 | 4008.75 | 346.04 | 4842.92 | 66 |
| H7A | 2602.76 | 4290.61 | 5789.68 | 108 |
| H7B | 2510.73 | 3274.93 | 6782.08 | 108 |
| H7C | 1785.58 | 3354.01 | 5248.86 | 108 |
| H9A | 7882.37 | 4365.35 | 2140.75 | 71 |
| H9B | 7491.62 | 4341.6 | 481.07 | 71 |
| H9AA | 7419.93 | 4390.04 | 879.22 | 90 |
| H9AB | 8232.07 | 4003.62 | 79.61 | 90 |
| H10A | 9078.17 | 5267.73 | 1286.97 | 83 |
| H10B | 9099.74 | 4297.31 | 199.2 | 83 |
| H10C | 8745.46 | 4093.15 | 3051.05 | 87 |
| H10D | 8800 | 5200.88 | 2202.18 | 87 |
| H11A | 10441.33 | 4489.06 | 2888.3 | 81 |
| H11B | 10077.8 | 4291.92 | 1229.54 | 81 |
| H11C | 10477.39 | 4425.66 | 2490.2 | 114 |
| H11D | 9706.58 | 3734.19 | 3098.41 | 114 |
| H12A | 10909.18 | 2632.42 | 2406.13 | 97 |
| H12B | 10424.98 | 2993.79 | 829.05 | 97 |
| H12C | 10751.91 | 2434.61 | 2761.87 | 99 |
| H12D | 9692.43 | 2432.94 | 3114.27 | 99 |
| H13A | 9800.76 | 1211.47 | 1184.69 | 83 |
| H13B | 9453.52 | 1642.22 | 2506.12 | 83 |
| H13C | 9864.32 | 1328 | 1230.41 | 93 |
| H13D | 9891.32 | 2453.97 | 405.18 | 93 |
| H14A | 8548.46 | 2452.75 | -234.98 | 78 |
| H14B | 8129.26 | 1381.87 | 370.73 | 78 |
| H14C | 8303.91 | 2282.95 | -371.34 | 78 |
| H14D | 8263.99 | 1319.12 | 704.22 | 78 |

| **Table S21Crystal data and structure refinement for (1).** | |
| --- | --- |
| Empirical formula | C12H17N5OS |
| Formula weight | 279.368 |
| Temperature/K | 304.00 |
| Crystal system | monoclinic |
| Space group | P21/c |
| a/Å | 14.9048(8) |
| b/Å | 8.1728(4) |
| c/Å | 12.9151(6) |
| α/° | 90 |
| β/° | 115.656(1) |
| γ/° | 90 |
| Volume/Å3 | 1418.13(12) |
| Z | 4 |
| ρcalcg/cm3 | 1.308 |
| μ/mm‑1 | 0.229 |
| F(000) | 592.8 |
| Crystal size/mm3 | 0.31 × 0.182 × 0.144 |
| Radiation | Mo Kα (λ = 0.71073) |
| 2θ range for data collection/° | 5.84 to 50.08 |
| Index ranges | -17 ≤ h ≤ 17, -9 ≤ k ≤ 9, -15 ≤ l ≤ 15 |
| Reflections collected | 33756 |
| Independent reflections | 2497 [Rint = 0.0662, Rsigma = 0.0273] |
| Data/restraints/parameters | 2497/0/325 |
| Goodness-of-fit on F2 | 1.161 |
| Final R indexes [I≥2σ (I)] | R1 = 0.0266, wR2 = 0.0557 |
| Final R indexes [all data] | R1 = 0.0358, wR2 = 0.0613 |
| Largest diff. peak/hole / e Å-3 | 0.21/-0.17 |

| **Table S22 Crystal data and structure refinement for (2).** | |
| --- | --- |
| Empirical formula | C12H17N5S2 |
| Formula weight | 295.435 |
| Temperature/K | 304.00 |
| Crystal system | monoclinic |
| Space group | P21/c |
| a/Å | 4.6976(3) |
| b/Å | 23.5228(14) |
| c/Å | 12.9680(8) |
| α/° | 90 |
| β/° | 98.898(2) |
| γ/° | 90 |
| Volume/Å3 | 1415.73(15) |
| Z | 4 |
| ρcalcg/cm3 | 1.386 |
| μ/mm‑1 | 0.370 |
| F(000) | 625.3 |
| Crystal size/mm3 | 0.577 × 0.19 × 0.033 |
| Radiation | Mo Kα (λ = 0.71073) |
| 2θ range for data collection/° | 6.1 to 50.64 |
| Index ranges | -5 ≤ h ≤ 5, -28 ≤ k ≤ 28, -15 ≤ l ≤ 15 |
| Reflections collected | 28765 |
| Independent reflections | 2583 [Rint = 0.0600, Rsigma = 0.0263] |
| Data/restraints/parameters | 2583/3/325 |
| Goodness-of-fit on F2 | 1.129 |
| Final R indexes [I≥2σ (I)] | R1 = 0.0379, wR2 = 0.0686 |
| Final R indexes [all data] | R1 = 0.0468, wR2 = 0.0727 |
| Largest diff. peak/hole / e Å-3 | 0.26/-0.24 |

| **Table S23 Crystal data and structure refinement for (3).** | |
| --- | --- |
| Empirical formula | C12H17N5S2 |
| Formula weight | 295.435 |
| Temperature/K | 304.00 |
| Crystal system | monoclinic |
| Space group | P21/c |
| a/Å | 12.7318(8) |
| b/Å | 9.3493(4) |
| c/Å | 12.7744(7) |
| α/° | 90 |
| β/° | 110.021(2) |
| γ/° | 90 |
| Volume/Å3 | 1428.69(14) |
| Z | 4 |
| ρcalcg/cm3 | 1.374 |
| μ/mm‑1 | 0.367 |
| F(000) | 625.3 |
| Crystal size/mm3 | 0.3 × 0.287 × 0.162 |
| Radiation | Mo Kα (λ = 0.71073) |
| 2θ range for data collection/° | 5.52 to 51.44 |
| Index ranges | -15 ≤ h ≤ 15, -11 ≤ k ≤ 11, -15 ≤ l ≤ 15 |
| Reflections collected | 41241 |
| Independent reflections | 2723 [Rint = 0.0617, Rsigma = 0.0236] |
| Data/restraints/parameters | 2723/0/325 |
| Goodness-of-fit on F2 | 1.126 |
| Final R indexes [I≥2σ (I)] | R1 = 0.0295, wR2 = 0.0578 |
| Final R indexes [all data] | R1 = 0.0369, wR2 = 0.0623 |
| Largest diff. peak/hole / e Å-3 | 0.40/-0.38 |

| **Table S24 Crystal data and structure refinement for (4).** | |
| --- | --- |
| Empirical formula | C14H21N5S |
| Formula weight | 291.423 |
| Temperature/K | 304.00 |
| Crystal system | monoclinic |
| Space group | P21/c |
| a/Å | 13.6786(8) |
| b/Å | 11.8525(6) |
| c/Å | 9.7198(5) |
| α/° | 90 |
| β/° | 104.815(2) |
| γ/° | 90 |
| Volume/Å3 | 1523.44(14) |
| Z | 4 |
| ρcalcg/cm3 | 1.271 |
| μ/mm‑1 | 0.211 |
| F(000) | 624.8 |
| Crystal size/mm3 | 0.61 × 0.325 × 0.055 |
| Radiation | Mo Kα (λ = 0.71073) |
| 2θ range for data collection/° | 6.16 to 50.08 |
| Index ranges | -16 ≤ h ≤ 16, -14 ≤ k ≤ 14, -11 ≤ l ≤ 11 |
| Reflections collected | 43370 |
| Independent reflections | 2702 [Rint = 0.0793, Rsigma = 0.0308] |
| Data/restraints/parameters | 2702/301/416 |
| Goodness-of-fit on F2 | 1.182 |
| Final R indexes [I≥2σ (I)] | R1 = 0.0409, wR2 = 0.0853 |
| Final R indexes [all data] | R1 = 0.0561, wR2 = 0.0951 |
| Largest diff. peak/hole / e Å-3 | 0.23/-0.21 |

| **Table S25 Bond Lengths for (1).** | | | | | | |
| --- | --- | --- | --- | --- | --- | --- |
| **Atom** | **Atom** | **Length/Å** |  | **Atom** | **Atom** | **Length/Å** |
| S1 | C8 | 1.7174(12) |  | N5 | C2 | 1.3387(15) |
| O1 | C10 | 1.420(2) |  | N5 | C6 | 1.3338(17) |
| O1 | C11 | 1.4200(19) |  | C1 | C2 | 1.4837(16) |
| N1 | C1 | 1.3275(16) |  | C2 | C3 | 1.3849(18) |
| N2 | N3 | 1.3699(15) |  | C3 | C4 | 1.3968(18) |
| N2 | C1 | 1.3030(16) |  | C4 | C5 | 1.383(2) |
| N3 | C8 | 1.3169(15) |  | C4 | C7 | 1.493(2) |
| N4 | C8 | 1.3813(15) |  | C5 | C6 | 1.387(2) |
| N4 | C9 | 1.4598(18) |  | C9 | C10 | 1.506(2) |
| N4 | C12 | 1.4535(18) |  | C11 | C12 | 1.509(2) |

| **Table S26 Bond Angles for (1).** | | | | | | | | |
| --- | --- | --- | --- | --- | --- | --- | --- | --- |
| **Atom** | **Atom** | **Atom** | **Angle/˚** |  | **Atom** | **Atom** | **Atom** | **Angle/˚** |
| C11 | O1 | C10 | 109.64(14) |  | C4 | C3 | C2 | 119.19(13) |
| C1 | N2 | N3 | 120.32(11) |  | C5 | C4 | C3 | 117.07(13) |
| C8 | N3 | N2 | 113.50(10) |  | C7 | C4 | C3 | 121.30(15) |
| C9 | N4 | C8 | 118.43(11) |  | C7 | C4 | C5 | 121.63(15) |
| C12 | N4 | C8 | 120.70(11) |  | C6 | C5 | C4 | 119.77(14) |
| C12 | N4 | C9 | 112.64(13) |  | C5 | C6 | N5 | 123.54(14) |
| C6 | N5 | C2 | 116.68(12) |  | N3 | C8 | S1 | 125.12(9) |
| N2 | C1 | N1 | 120.43(13) |  | N4 | C8 | S1 | 120.30(9) |
| C2 | C1 | N1 | 122.38(12) |  | N4 | C8 | N3 | 114.58(10) |
| C2 | C1 | N2 | 117.18(11) |  | C10 | C9 | N4 | 110.27(15) |
| C1 | C2 | N5 | 114.49(11) |  | C9 | C10 | O1 | 111.71(16) |
| C3 | C2 | N5 | 123.73(12) |  | C12 | C11 | O1 | 111.25(14) |
| C3 | C2 | C1 | 121.78(11) |  | C11 | C12 | N4 | 110.22(14) |

| **Table S27 Bond Lengths for (2).** | | | | | | |
| --- | --- | --- | --- | --- | --- | --- |
| **Atom** | **Atom** | **Length/Å** |  | **Atom** | **Atom** | **Length/Å** |
| S1 | C8 | 1.7303(19) |  | N5 | C2 | 1.334(2) |
| S2 | C10 | 1.811(3) |  | N5 | C6 | 1.330(3) |
| S2 | C11 | 1.809(3) |  | C1 | C2 | 1.477(3) |
| N1 | C1 | 1.330(3) |  | C2 | C3 | 1.389(3) |
| N2 | N3 | 1.378(2) |  | C3 | C4 | 1.391(3) |
| N2 | C1 | 1.305(2) |  | C4 | C5 | 1.389(3) |
| N3 | C8 | 1.341(2) |  | C4 | C7 | 1.493(4) |
| N4 | C8 | 1.359(2) |  | C5 | C6 | 1.390(4) |
| N4 | C9 | 1.464(3) |  | C9 | C10 | 1.515(3) |
| N4 | C12 | 1.447(3) |  | C11 | C12 | 1.518(3) |

| **Table S28 Bond Angles for (2).** | | | | | | | | |
| --- | --- | --- | --- | --- | --- | --- | --- | --- |
| **Atom** | **Atom** | **Atom** | **Angle/˚** |  | **Atom** | **Atom** | **Atom** | **Angle/˚** |
| C11 | S2 | C10 | 97.48(13) |  | C4 | C3 | C2 | 119.5(2) |
| C1 | N2 | N3 | 120.15(16) |  | C5 | C4 | C3 | 117.6(2) |
| C8 | N3 | N2 | 112.01(15) |  | C7 | C4 | C3 | 121.4(2) |
| C9 | N4 | C8 | 121.77(17) |  | C7 | C4 | C5 | 121.0(2) |
| C12 | N4 | C8 | 123.23(18) |  | C6 | C5 | C4 | 118.7(2) |
| C12 | N4 | C9 | 114.85(19) |  | C5 | C6 | N5 | 123.8(2) |
| C6 | N5 | C2 | 117.4(2) |  | N3 | C8 | S1 | 123.75(14) |
| N2 | C1 | N1 | 120.6(2) |  | N4 | C8 | S1 | 121.67(14) |
| C2 | C1 | N1 | 118.60(19) |  | N4 | C8 | N3 | 114.57(16) |
| C2 | C1 | N2 | 120.77(17) |  | C10 | C9 | N4 | 111.6(2) |
| C1 | C2 | N5 | 114.65(17) |  | C9 | C10 | S2 | 112.52(18) |
| C3 | C2 | N5 | 122.94(19) |  | C12 | C11 | S2 | 112.15(19) |
| C3 | C2 | C1 | 122.39(17) |  | C11 | C12 | N4 | 111.43(19) |

| **Table S29 Bond Lengths for (3).** | | | | | | |
| --- | --- | --- | --- | --- | --- | --- |
| **Atom** | **Atom** | **Length/Å** |  | **Atom** | **Atom** | **Length/Å** |
| S1 | C8 | 1.7233(13) |  | N5 | C2 | 1.3429(17) |
| S2 | C10 | 1.8098(19) |  | N5 | C6 | 1.3294(18) |
| S2 | C11 | 1.8013(18) |  | C1 | C2 | 1.4784(18) |
| N1 | C1 | 1.3314(19) |  | C2 | C3 | 1.385(2) |
| N2 | N3 | 1.3694(16) |  | C3 | C4 | 1.388(2) |
| N2 | C1 | 1.3066(18) |  | C4 | C5 | 1.377(2) |
| N3 | C8 | 1.3296(17) |  | C5 | C6 | 1.400(2) |
| N4 | C8 | 1.3635(17) |  | C6 | C7 | 1.499(2) |
| N4 | C9 | 1.4612(18) |  | C9 | C10 | 1.514(3) |
| N4 | C12 | 1.4549(19) |  | C11 | C12 | 1.524(3) |

| **Table S30 Bond Angles for (3).** | | | | | | | | |
| --- | --- | --- | --- | --- | --- | --- | --- | --- |
| **Atom** | **Atom** | **Atom** | **Angle/˚** |  | **Atom** | **Atom** | **Atom** | **Angle/˚** |
| C11 | S2 | C10 | 96.99(9) |  | C4 | C3 | C2 | 118.02(15) |
| C1 | N2 | N3 | 119.13(12) |  | C5 | C4 | C3 | 119.38(17) |
| C8 | N3 | N2 | 114.06(11) |  | C6 | C5 | C4 | 118.87(16) |
| C9 | N4 | C8 | 121.82(13) |  | C5 | C6 | N5 | 122.09(14) |
| C12 | N4 | C8 | 123.10(12) |  | C7 | C6 | N5 | 117.93(15) |
| C12 | N4 | C9 | 114.75(13) |  | C7 | C6 | C5 | 119.97(15) |
| C6 | N5 | C2 | 118.51(12) |  | N3 | C8 | S1 | 124.50(10) |
| N2 | C1 | N1 | 119.21(14) |  | N4 | C8 | S1 | 120.37(10) |
| C2 | C1 | N1 | 121.99(14) |  | N4 | C8 | N3 | 115.10(11) |
| C2 | C1 | N2 | 118.80(12) |  | C10 | C9 | N4 | 112.26(15) |
| C1 | C2 | N5 | 115.64(12) |  | C9 | C10 | S2 | 112.07(14) |
| C3 | C2 | N5 | 123.12(13) |  | C12 | C11 | S2 | 111.39(12) |
| C3 | C2 | C1 | 121.24(12) |  | C11 | C12 | N4 | 111.61(14) |

| **Table S31 Bond Lengths for (4).** | | | | | | |
| --- | --- | --- | --- | --- | --- | --- |
| **Atom** | **Atom** | **Length/Å** |  | **Atom** | **Atom** | **Length/Å** |
| S1 | C8 | 1.7318(18) |  | C4 | C5 | 1.393(3) |
| N1 | C1 | 1.335(2) |  | C4 | C7 | 1.489(3) |
| N2 | N3 | 1.362(2) |  | C5 | C6 | 1.394(3) |
| N2 | C1 | 1.306(2) |  | C9 | C10 | 1.524(8) |
| N3 | C8 | 1.332(2) |  | C9A | C10A | 1.47(3) |
| N4 | C8 | 1.360(2) |  | C10 | C11 | 1.522(13) |
| N4 | C9 | 1.488(8) |  | C10A | C11A | 1.58(2) |
| N4 | C9A | 1.37(3) |  | C11A | C12A | 1.63(2) |
| N4 | C14 | 1.449(2) |  | C11 | C12 | 1.472(11) |
| N5 | C2 | 1.341(2) |  | C12 | C13 | 1.561(8) |
| N5 | C6 | 1.324(2) |  | C12A | C13A | 1.38(3) |
| C1 | C2 | 1.475(2) |  | C13 | C14 | 1.513(7) |
| C2 | C3 | 1.386(2) |  | C13A | C14 | 1.52(2) |
| C3 | C4 | 1.395(3) |  |  |  |  |

| **Table S32 Bond Angles for (4).** | | | | | | | | |
| --- | --- | --- | --- | --- | --- | --- | --- | --- |
| **Atom** | **Atom** | **Atom** | **Angle/˚** |  | **Atom** | **Atom** | **Atom** | **Angle/˚** |
| C1 | N2 | N3 | 121.37(15) |  | C6 | C5 | C4 | 119.3(2) |
| C8 | N3 | N2 | 112.84(14) |  | C5 | C6 | N5 | 123.70(19) |
| C9 | N4 | C8 | 117.7(4) |  | N3 | C8 | S1 | 124.05(14) |
| C9A | N4 | C8 | 126.2(14) |  | N4 | C8 | S1 | 120.89(14) |
| C9A | N4 | C9 | 11.3(17) |  | N4 | C8 | N3 | 115.03(16) |
| C14 | N4 | C8 | 122.24(17) |  | C10 | C9 | N4 | 114.7(5) |
| C14 | N4 | C9 | 119.8(4) |  | C10A | C9A | N4 | 109(2) |
| C14 | N4 | C9A | 110.2(15) |  | C11 | C10 | C9 | 111.2(7) |
| C6 | N5 | C2 | 117.15(16) |  | C11A | C10A | C9A | 121.4(19) |
| N2 | C1 | N1 | 119.96(17) |  | C12A | C11A | C10A | 107.4(16) |
| C2 | C1 | N1 | 122.22(16) |  | C12 | C11 | C10 | 115.2(9) |
| C2 | C1 | N2 | 117.81(15) |  | C13 | C12 | C11 | 112.0(7) |
| C1 | C2 | N5 | 116.00(15) |  | C13A | C12A | C11A | 116(2) |
| C3 | C2 | N5 | 123.35(16) |  | C14 | C13 | C12 | 114.4(5) |
| C3 | C2 | C1 | 120.65(15) |  | C14 | C13A | C12A | 122(2) |
| C4 | C3 | C2 | 119.48(18) |  | C13 | C14 | N4 | 112.2(3) |
| C5 | C4 | C3 | 117.03(18) |  | C13A | C14 | N4 | 118.6(9) |
| C7 | C4 | C3 | 120.3(2) |  | C13A | C14 | C13 | 18.9(11) |
| C7 | C4 | C5 | 122.7(2) |  |  |  |  |  |

| **Table S33 Anisotropic Displacement Parameters (Å2×103) for (1). The Anisotropic displacement factor exponent takes the form: -2π2[h2a*2U11+2hka*b*U12+…].** | | | | | | |
| --- | --- | --- | --- | --- | --- | --- |
| **Atom** | **U11** | **U22** | **U33** | **U12** | **U13** | **U23** |
| S1 | 46.8(2) | 52.6(2) | 51.5(2) | 8.27(17) | 33.93(18) | 4.63(17) |
| O1 | 40.0(6) | 70.6(7) | 61.7(6) | 19.0(5) | 20.5(5) | 10.1(5) |
| N1 | 31.0(7) | 64.7(9) | 45.5(8) | -0.2(6) | 19.0(7) | 9.1(6) |
| H1a | 55(12) | 89(15) | 57(12) | 5(10) | 31(10) | 15(11) |
| H1b | 37(10) | 80(13) | 39(10) | 0(10) | -6(9) | -9(9) |
| N2 | 32.0(6) | 40.8(6) | 42.8(6) | 4.2(5) | 20.3(5) | 4.9(5) |
| H2 | 44(11) | 52(11) | 71(12) | 12(8) | 35(10) | 17(9) |
| N3 | 31.3(6) | 46.8(6) | 42.2(6) | 4.9(5) | 20.5(5) | 6.4(5) |
| N4 | 35.6(6) | 55.5(7) | 42.1(6) | 13.0(5) | 20.4(5) | 9.0(5) |
| N5 | 38.1(6) | 41.9(6) | 52.4(7) | 6.3(5) | 27.2(5) | 6.7(5) |
| C1 | 28.8(7) | 35.9(6) | 35.6(6) | -1.4(5) | 14.8(5) | -1.4(5) |
| C2 | 29.3(6) | 33.2(6) | 38.3(7) | -0.7(5) | 16.4(5) | -2.0(5) |
| C3 | 35.1(7) | 43.2(8) | 37.8(7) | -0.6(6) | 14.1(6) | 0.6(6) |
| H3 | 70(12) | 94(13) | 77(11) | 21(10) | 47(10) | 34(10) |
| C4 | 35.5(7) | 39.3(7) | 41.0(7) | 1.4(6) | 8.7(6) | -3.7(6) |
| C5 | 35.4(8) | 46.0(8) | 62.9(9) | 6.2(7) | 19.7(7) | -1.5(7) |
| H5 | 79(14) | 79(13) | 106(14) | 14(11) | 39(12) | -5(11) |
| C6 | 41.7(8) | 49.4(8) | 68.1(10) | 7.8(7) | 33.6(8) | 6.9(8) |
| H6 | 86(13) | 115(16) | 103(14) | 35(11) | 66(12) | 52(12) |
| C7 | 60.8(13) | 60.3(12) | 46.3(10) | 9.9(10) | 7.5(9) | 3.1(9) |
| H7a | 110(20) | 230(40) | 160(30) | 70(20) | 50(20) | 130(30) |
| H7b | 130(20) | 150(20) | 90(17) | -32(18) | -7(16) | 19(16) |
| H7c | 300(40) | 91(17) | 89(17) | 110(20) | 50(20) | 21(14) |
| C8 | 30.8(6) | 36.2(6) | 37.7(7) | 1.5(5) | 18.8(5) | -0.4(6) |
| C9 | 45.0(9) | 87.5(14) | 50.3(10) | 27.8(10) | 28.8(8) | 15.4(10) |
| H9a | 83(16) | 125(19) | 101(16) | 31(14) | 40(13) | -21(15) |
| H9b | 71(13) | 150(20) | 82(13) | 64(13) | 53(11) | 52(14) |
| C10 | 43.2(10) | 95.1(15) | 77.7(13) | 26.5(10) | 35.8(10) | 26.0(12) |
| H10a | 108(19) | 92(16) | 150(20) | -17(14) | 59(16) | -7(16) |
| H10b | 94(16) | 210(30) | 100(16) | 107(17) | 51(13) | 63(16) |
| C11 | 49.7(10) | 64.6(11) | 48.8(9) | 16.7(9) | 13.5(8) | 8.4(9) |
| H11a | 84(14) | 116(15) | 71(12) | 65(12) | 24(10) | 50(12) |
| H11b | 115(17) | 63(13) | 122(17) | -13(12) | 41(13) | -16(12) |
| C12 | 46.9(9) | 62.8(11) | 52.4(9) | 16.6(8) | 26.6(8) | 14.9(8) |
| H12a | 94(14) | 139(17) | 61(11) | 55(13) | 54(11) | 25(11) |
| H12b | 93(15) | 49(11) | 122(16) | -5(11) | 49(12) | 1(11) |

| **Table S34 Anisotropic Displacement Parameters (Å2×103) for (2). The Anisotropic displacement factor exponent takes the form: -2π2[h2a*2U11+2hka*b*U12+…].** | | | | | | |
| --- | --- | --- | --- | --- | --- | --- |
| **Atom** | **U11** | **U22** | **U33** | **U12** | **U13** | **U23** |
| S1 | 53.7(3) | 37.4(3) | 26.9(3) | -0.9(2) | 5.6(2) | 0.5(2) |
| S2 | 68.0(4) | 33.7(3) | 72.6(5) | -4.4(3) | 10.7(3) | -7.0(3) |
| N1 | 62.6(16) | 52.4(14) | 29.2(12) | -17.0(11) | 7.3(10) | -1.3(10) |
| H1a | 80(20) | 90(20) | 38(18) | -50(20) | -13(15) | 2(17) |
| H1b | 90(20) | 70(20) | 36(17) | -16(18) | 16(16) | -6(15) |
| N2 | 38.4(9) | 30.8(9) | 28.3(9) | -5.7(7) | 7.3(7) | -1.3(7) |
| H2 | 80(20) | 43(16) | 33(5) | -7(14) | 3(3) | -3(3) |
| N3 | 36.5(9) | 29.8(8) | 29.4(9) | -6.3(7) | 9.3(7) | -0.9(7) |
| N4 | 45.6(10) | 36.3(10) | 32.5(9) | -9.4(8) | 9.3(8) | 1.2(7) |
| N5 | 50.1(11) | 51.3(12) | 37.1(10) | -13.2(9) | 6.8(9) | 11.9(9) |
| C1 | 34.0(11) | 31.0(10) | 28.1(10) | -2.2(8) | 6.3(8) | 0.2(8) |
| C2 | 33.4(11) | 27.3(10) | 31.2(11) | 0.8(8) | 5.7(8) | 1.7(8) |
| C3 | 38.6(12) | 31.1(11) | 32.2(12) | -4.4(9) | 3.8(9) | -1.1(9) |
| H3 | 64(17) | 72(18) | 41(15) | -25(14) | 17(13) | -6(13) |
| C4 | 42.3(12) | 30.4(11) | 42.8(12) | -4.5(9) | 2.4(10) | -3.8(9) |
| C5 | 47.5(15) | 38.4(13) | 62.1(17) | -13.2(11) | 4.9(12) | 4.8(12) |
| H5 | 65(19) | 90(20) | 90(20) | -33(17) | -1(15) | 3(17) |
| C6 | 58.5(16) | 53.3(16) | 54.1(17) | -20.7(13) | 6.5(13) | 16.9(13) |
| H6 | 100(20) | 90(20) | 100(20) | -60(18) | -4(18) | 31(18) |
| C7 | 71(2) | 64(2) | 52.2(18) | -17.7(18) | -7.2(16) | -11.2(16) |
| H7a | 140(40) | 190(50) | 80(30) | 30(30) | 20(20) | -50(30) |
| H7b | 170(40) | 100(30) | 110(30) | 20(30) | -40(30) | 0(20) |
| H7c | 160(40) | 180(40) | 90(30) | -130(30) | -20(20) | 0(20) |
| C8 | 32.3(10) | 26.5(10) | 27.1(10) | 3.1(8) | 6.3(8) | 0.2(8) |
| C9 | 44.9(15) | 39.3(13) | 37.3(13) | -11.6(12) | 1.4(11) | -0.1(10) |
| H9a | 32(14) | 50(15) | 70(17) | -32(12) | -7(12) | -6(12) |
| H9b | 100(20) | 53(17) | 60(18) | -38(16) | -11(15) | 4(14) |
| C10 | 51.1(17) | 51.0(15) | 47.6(15) | -8.9(13) | 11.3(13) | -13.8(12) |
| H10a | 36(16) | 130(30) | 62(18) | -19(16) | 11(14) | -25(16) |
| H10b | 120(30) | 62(19) | 64(19) | -11(17) | 9(18) | -25(16) |
| C11 | 54.1(17) | 35.8(14) | 53.5(16) | 1.7(12) | 8.3(13) | 11.0(11) |
| H11a | 110(20) | 41(16) | 80(20) | -1(16) | 22(18) | 7(15) |
| H11b | 46(17) | 51(17) | 100(20) | 13(14) | -15(16) | 28(15) |
| C12 | 43.4(14) | 36.2(12) | 44.1(14) | -3.5(11) | 19.7(12) | 2.4(10) |
| H12a | 110(20) | 56(18) | 48(17) | -13(16) | 18(16) | 0(14) |
| H12b | 32(14) | 63(17) | 79(18) | -6(12) | 32(13) | -8(13) |

| **Table S35 Anisotropic Displacement Parameters (Å2×103) for (3). The Anisotropic displacement factor exponent takes the form: -2π2[h2a*2U11+2hka*b*U12+…].** | | | | | | |
| --- | --- | --- | --- | --- | --- | --- |
| **Atom** | **U11** | **U22** | **U33** | **U12** | **U13** | **U23** |
| S1 | 82.6(3) | 36.5(2) | 24.66(18) | 6.2(2) | 16.32(19) | 3.86(16) |
| S2 | 51.4(3) | 72.1(3) | 41.9(2) | 19.9(2) | 4.41(19) | -8.9(2) |
| N1 | 69.9(10) | 39.5(9) | 28.2(7) | 10.1(8) | 10.6(7) | -1.5(7) |
| H1a | 68(15) | 47(13) | 57(13) | 22(11) | 23(11) | 8(11) |
| H1b | 90(17) | 44(12) | 65(14) | 11(11) | 21(12) | -13(11) |
| N2 | 40.5(7) | 30.4(6) | 26.0(6) | 2.8(5) | 9.6(5) | 0.7(5) |
| H2 | 62(15) | 66(15) | 27(11) | 10(11) | 7(10) | 12(10) |
| N3 | 44.2(7) | 33.3(6) | 25.9(6) | 6.3(5) | 11.2(5) | 2.0(5) |
| N4 | 56.7(8) | 37.9(7) | 27.8(6) | 14.4(6) | 15.5(6) | 4.6(5) |
| N5 | 38.4(7) | 31.6(6) | 29.8(6) | 2.4(5) | 10.3(5) | 1.1(5) |
| C1 | 34.0(7) | 29.7(7) | 26.4(7) | -0.9(6) | 8.0(6) | -0.7(6) |
| C2 | 32.7(7) | 28.7(7) | 27.8(7) | -1.5(6) | 7.9(6) | -1.2(6) |
| C3 | 59.0(10) | 37.6(9) | 33.1(8) | 8.2(7) | 8.2(8) | -6.1(7) |
| H3 | 122(19) | 67(14) | 53(12) | 32(13) | 21(12) | -10(11) |
| C4 | 74.3(13) | 34.8(9) | 45.1(10) | 14.3(8) | 10.8(9) | -3.8(8) |
| H4 | 140(20) | 56(13) | 73(14) | 33(14) | 17(14) | -17(12) |
| C5 | 54.7(10) | 32.9(8) | 46.6(10) | 8.1(7) | 10.9(8) | 5.1(7) |
| H5 | 103(17) | 43(11) | 79(14) | 21(12) | 22(13) | 15(11) |
| C6 | 39.8(8) | 34.5(8) | 35.0(8) | 3.8(6) | 11.3(6) | 6.2(6) |
| C7 | 75.7(15) | 61.0(13) | 38.2(10) | 20.3(12) | 19.7(11) | 15.4(9) |
| H7a | 210(30) | 180(30) | 84(19) | 140(30) | 60(20) | 19(19) |
| H7b | 80(20) | 390(70) | 74(19) | 110(30) | -7(17) | 0(30) |
| H7c | 390(70) | 100(20) | 110(30) | -110(30) | 100(40) | 8(19) |
| C8 | 38.2(8) | 29.8(7) | 24.2(6) | 0.6(6) | 11.7(6) | 2.0(5) |
| C9 | 56.2(11) | 46.3(10) | 30.5(8) | 16.2(9) | 19.8(7) | 9.5(7) |
| H9a | 97(16) | 82(15) | 49(12) | 44(13) | 21(11) | 5(11) |
| H9b | 113(18) | 52(12) | 82(15) | -5(12) | 57(13) | 29(11) |
| C10 | 60.2(12) | 62.1(12) | 33.4(10) | 11.8(10) | 8.7(8) | -10.0(9) |
| H10a | 98(17) | 140(20) | 31(12) | 62(16) | -2(11) | 6(13) |
| H10b | 120(20) | 71(16) | 110(20) | -4(15) | 46(17) | -29(16) |
| C11 | 50.2(10) | 41.5(9) | 46.1(9) | 1.0(8) | 24.5(8) | -5.0(8) |
| H11a | 100(17) | 60(13) | 84(15) | -25(12) | 53(13) | -16(12) |
| H11b | 69(14) | 64(13) | 50(11) | 13(11) | 20(10) | -4(10) |
| C12 | 53.4(10) | 34.6(9) | 30.5(8) | 7.5(7) | 10.9(7) | -2.2(7) |
| H12a | 71(14) | 37(11) | 95(16) | -11(10) | 27(12) | -13(11) |
| H12b | 98(17) | 102(17) | 41(12) | 44(14) | 16(12) | -4(12) |

| **Table S36 Anisotropic Displacement Parameters (Å2×103) for (4). The Anisotropic displacement factor exponent takes the form: -2π2[h2a*2U11+2hka*b*U12+…].** | | | | | | |
| --- | --- | --- | --- | --- | --- | --- |
| **Atom** | **U11** | **U22** | **U33** | **U12** | **U13** | **U23** |
| S1 | 61.3(3) | 34.4(3) | 87.9(4) | -5.1(2) | 29.1(3) | -11.2(2) |
| N1 | 57.6(11) | 32.8(9) | 67.9(11) | -3.9(8) | 26.8(9) | 0.8(8) |
| H1a | 75(11) | 44(12) | 96(14) | 4(6) | 47(6) | 13(8) |
| H1b | 83(10) | 58(11) | 117(18) | 15(5) | 57(6) | 16(8) |
| N2 | 45.6(9) | 31.4(8) | 60.7(10) | -2.3(7) | 18.6(7) | -1.0(7) |
| H2 | 55(14) | 35(4) | 86(16) | -4(3) | 10(12) | 6(3) |
| N3 | 44.6(9) | 35.4(8) | 63.5(10) | -2.5(7) | 21.9(7) | -1.3(7) |
| N4 | 47.4(9) | 48.2(10) | 67.2(11) | 3.5(7) | 23.4(8) | -0.3(8) |
| N5 | 50.7(9) | 29.7(8) | 65.6(10) | -2.0(7) | 20.4(8) | -0.3(7) |
| C1 | 42.7(10) | 29.8(9) | 49.5(10) | -3.6(7) | 13.5(8) | -1.7(7) |
| C2 | 41.4(10) | 29.8(9) | 46.5(10) | -2.6(7) | 11.9(8) | -0.8(7) |
| C3 | 50.7(11) | 33.8(10) | 49.6(11) | -0.6(9) | 18.1(8) | -1.2(8) |
| H3 | 94(18) | 36(12) | 115(19) | 10(12) | 48(15) | -8(12) |
| C4 | 46.9(10) | 46.8(11) | 50.5(11) | -3.2(9) | 17.6(8) | -1.3(8) |
| C5 | 56.4(13) | 45.4(12) | 62.6(13) | -11.1(10) | 21.7(10) | 1.9(10) |
| H5 | 79(17) | 72(17) | 130(20) | -6(13) | 50(15) | 11(15) |
| C6 | 60.7(13) | 34.2(11) | 72.2(14) | -5.4(10) | 25.7(10) | 2.8(10) |
| H6 | 91(18) | 66(17) | 130(20) | -16(14) | 51(16) | 13(15) |
| C7 | 70.6(17) | 68.2(17) | 97(2) | -0.9(14) | 49.2(15) | -5.5(15) |
| H7a | 108(14) | 81(5) | 170(13) | -4(3) | 82(6) | -4(3) |
| H7b | 93(7) | 122(14) | 133(10) | -20(4) | 50(4) | 0(6) |
| H7c | 118(14) | 121(15) | 120(6) | -19(7) | 61(3) | 5(4) |
| C8 | 41.1(10) | 37.4(10) | 53.3(11) | -3.3(8) | 13.5(8) | -4.6(8) |
| C9 | 52(3) | 41(2) | 102(5) | 4.6(18) | 37(3) | 8(2) |
| H9a | 100(20) | 90(20) | 120(20) | 25(15) | 40(15) | 39(15) |
| H9b | 100(20) | 56(18) | 130(20) | -19(13) | 76(16) | -34(14) |
| C9A | 67(10) | 61(11) | 61(9) | 10(6) | 25(6) | 27(6) |
| C10 | 60.8(19) | 47.8(18) | 100(3) | -5.5(14) | 39(2) | 8.4(18) |
| H10a | 110(30) | 110(30) | 90(20) | -19(18) | 69(19) | 29(18) |
| H10b | 90(20) | 80(20) | 130(20) | -19(15) | 49(15) | 10(15) |
| C10A | 77(8) | 51(6) | 99(10) | 2(5) | 24(5) | -3(5) |
| C11A | 37(9) | 35(8) | 84(10) | -8(6) | 22(6) | -26(6) |
| C11 | 60(4) | 79(5) | 152(6) | -9(3) | 11(3) | -9(4) |
| H11c | 150(40) | 120(40) | 100(30) | -30(30) | 30(30) | -60(30) |
| H11d | 110(30) | 160(40) | 110(30) | 10(30) | 40(30) | 10(30) |
| C12 | 59(3) | 88(3) | 90(4) | 15(2) | 24(3) | -8(3) |
| H12a | 100(30) | 100(30) | 80(20) | -30(20) | 40(20) | -20(20) |
| H12b | 40(20) | 160(40) | 250(60) | 20(30) | 20(30) | -20(40) |
| C12A | 68(10) | 98(11) | 63(10) | 28(8) | 10(7) | -20(8) |
| C13 | 77(3) | 60(3) | 88(3) | 32(2) | 39(2) | 15(3) |
| H13a | 150(30) | 60(20) | 100(20) | 60(20) | 30(20) | -11(18) |
| H13b | 80(20) | 110(30) | 120(30) | 30(20) | 60(20) | 70(20) |
| C13A | 64(9) | 65(11) | 112(15) | 11(7) | 31(8) | -29(9) |
| C14 | 67.0(15) | 59.1(14) | 71.9(16) | 1.7(12) | 31.4(12) | -9.1(12) |
| H14a | 114(19) | 76(9) | 93(14) | -27(6) | 64(10) | -29(6) |
| H14b | 90(20) | 99(19) | 76(9) | -28(10) | 27(7) | -2(5) |

| **Table S37 Hydrogen Atom Coordinates (Å×104) and Isotropic Displacement Parameters (Å2×103) for (1).** | | | | |
| --- | --- | --- | --- | --- |
| **Atom** | ***x*** | ***y*** | ***z*** | **U(eq)** |
| H1a | 7015(12) | 7880(20) | 4356(15) | 64(5) |
| H1b | 7853(13) | 6600(20) | 5392(13) | 60(5) |
| H2 | 6366(12) | 5639(19) | 6750(14) | 52(5) |
| H3 | 5551(12) | 8570(20) | 3474(14) | 75(5) |
| H5 | 2854(14) | 8940(20) | 3865(16) | 89(6) |
| H6 | 3669(13) | 7210(20) | 5632(15) | 92(6) |
| H7a | 4230(20) | 10190(50) | 2160(30) | 169(14) |
| H7b | 3140(20) | 9440(30) | 1830(20) | 143(11) |
| H7c | 3480(30) | 11080(30) | 2610(20) | 171(15) |
| H9a | 9008(15) | 1980(30) | 7124(17) | 103(7) |
| H9b | 9183(13) | 4140(30) | 6920(16) | 96(7) |
| H10a | 10768(17) | 4150(30) | 8620(20) | 116(8) |
| H10b | 10750(15) | 2410(30) | 7712(17) | 130(10) |
| H11a | 10429(13) | 1380(30) | 10544(15) | 94(6) |
| H11b | 10589(15) | 3540(20) | 10267(17) | 104(7) |
| H12a | 8881(13) | 3090(20) | 9859(14) | 91(6) |
| H12b | 8821(14) | 1320(20) | 8974(16) | 87(6) |

| **Table S38 Hydrogen Atom Coordinates (Å×104) and Isotropic Displacement Parameters (Å2×103) for (2).** | | | | |
| --- | --- | --- | --- | --- |
| **Atom** | ***x*** | ***y*** | ***z*** | **U(eq)** |
| H1a | 5400(70) | 3049(14) | 4990(20) | 73(10) |
| H1b | 7830(70) | 3609(13) | 4780(20) | 65(9) |
| H2 | 6950(60) | 3253(11) | 7760(20) | 53(8) |
| H3 | 10370(50) | 3746(10) | 8182(17) | 58(7) |
| H5 | 15360(50) | 5079(12) | 7110(20) | 81(9) |
| H6 | 12810(60) | 4919(12) | 5360(20) | 98(10) |
| H7a | 13070(90) | 4660(20) | 9330(30) | 138(18) |
| H7b | 15340(90) | 4148(16) | 9200(30) | 132(16) |
| H7c | 16350(90) | 4798(18) | 8930(30) | 146(18) |
| H9a | -2060(50) | 2017(9) | 6005(17) | 52(6) |
| H9b | 1000(60) | 2334(10) | 5623(19) | 74(8) |
| H10a | 3470(60) | 1395(12) | 5937(19) | 76(9) |
| H10b | 210(70) | 1330(11) | 5050(20) | 84(9) |
| H11a | 380(60) | 922(10) | 8460(20) | 78(8) |
| H11b | 3600(60) | 1169(10) | 8050(20) | 69(8) |
| H12a | 970(60) | 1994(11) | 8730(20) | 69(8) |
| H12b | -2040(50) | 1821(9) | 7823(18) | 55(7) |

| **Table S39 Hydrogen Atom Coordinates (Å×104) and Isotropic Displacement Parameters (Å2×103) for (3).** | | | | |
| --- | --- | --- | --- | --- |
| **Atom** | ***x*** | ***y*** | ***z*** | **U(eq)** |
| H1a | 2729(17) | 6850(20) | 6592(16) | 57(6) |
| H1b | 2323(18) | 8560(20) | 6713(17) | 67(6) |
| H2 | 2019(16) | 6780(20) | 3738(15) | 54(6) |
| H3 | 1562(18) | 10370(20) | 5956(16) | 83(7) |
| H4 | 720(20) | 12490(20) | 4842(17) | 94(8) |
| H5 | 296(18) | 12409(19) | 2795(16) | 78(6) |
| H7a | 900(30) | 9300(40) | 1330(20) | 156(15) |
| H7b | -220(20) | 10230(60) | 1170(20) | 190(20) |
| H7c | 880(50) | 11050(40) | 1330(30) | 200(20) |
| H9a | 3280(17) | 4010(20) | 6561(14) | 77(6) |
| H9b | 3309(18) | 2100(20) | 6415(16) | 76(6) |
| H10a | 5050(19) | 2930(30) | 7765(16) | 97(8) |
| H10b | 5190(20) | 4130(30) | 6720(20) | 101(8) |
| H11a | 5342(17) | 3010(20) | 4777(16) | 76(6) |
| H11b | 5269(15) | 1160(20) | 4534(14) | 61(5) |
| H12a | 3410(15) | 1088(19) | 4704(16) | 68(6) |
| H12b | 3446(18) | 2310(20) | 3645(16) | 82(7) |

| **Table S40 Hydrogen Atom Coordinates (Å×104) and Isotropic Displacement Parameters (Å2×103) for (4).** | | | | |
| --- | --- | --- | --- | --- |
| **Atom** | ***x*** | ***y*** | ***z*** | **U(eq)** |
| H1a | 5678(18) | 4744(18) | 2540(30) | 67(7) |
| H1b | 4645(19) | 4907(19) | 3200(30) | 80(8) |
| H2 | 5949(16) | 1906(18) | 3170(20) | 60(6) |
| H3 | 3850(16) | 4273(16) | 4550(20) | 78(7) |
| H5 | 2820(17) | 1201(19) | 5830(30) | 89(7) |
| H6 | 4048(18) | 190(20) | 4840(30) | 93(8) |
| H7a | 2550(20) | 4290(20) | 5790(30) | 111(6) |
| H7b | 1710(20) | 3240(20) | 5310(30) | 112(7) |
| H7c | 2360(20) | 3210(20) | 6770(30) | 114(7) |
| H9a | 7410(30) | 4310(30) | 350(40) | 100(10) |
| H9b | 7810(20) | 4420(20) | 2260(40) | 87(9) |
| H9Aa | 8200(20) | 3990(20) | 30(30) | 74(7) |
| H9Ab | 7360(20) | 4380(20) | 990(30) | 74(7) |
| H10a | 9120(20) | 4330(30) | 100(40) | 97(11) |
| H10b | 9010(20) | 5390(30) | 1240(40) | 94(9) |
| H10c | 8814(9) | 5276(9) | 2074(19) | 90(5) |
| H10d | 8731(9) | 4161(9) | 3140(19) | 90(5) |
| H11a | 10205(18) | 4335(17) | 1300(30) | 61(6) |
| H11b | 10498(18) | 4459(17) | 3130(30) | 61(6) |
| H11c | 10460(40) | 4530(40) | 2270(40) | 123(17) |
| H11d | 9750(30) | 3790(40) | 3330(50) | 124(18) |
| H12a | 10410(30) | 3050(30) | 690(40) | 91(12) |
| H12b | 11060(30) | 2620(40) | 2510(60) | 153(19) |
| H12c | 10881(14) | 2480(13) | 2652(19) | 93(6) |
| H12d | 9811(14) | 2443(13) | 3250(19) | 93(6) |
| H13a | 9810(30) | 1220(30) | 920(40) | 104(12) |
| H13b | 9440(20) | 1540(30) | 2620(40) | 95(12) |
| H13c | 9931(18) | 2330(20) | 360(30) | 95(8) |
| H13d | 9831(18) | 1220(20) | 1430(30) | 95(8) |
| H14a | 8080(20) | 1340(30) | 300(30) | 88(9) |
| H14b | 8580(20) | 2530(30) | -350(30) | 87(9) |
| H14c | 8214.1(18) | 1255(2) | 656(3) | 76.2(7) |
| H14d | 8318.0(18) | 2336(2) | -455(3) | 76.2(7) |
